# Supplementary material for: Particle Size Modulates Silver Nanoparticle Toxicity during Embryogenesis of Urchins Arbacia lixula and Paracentrotus lividus
Source: MDPI journal article supplement (doi:10.3390/ijms24010745), 2023-01-01
Supplement: s1 [file s1]

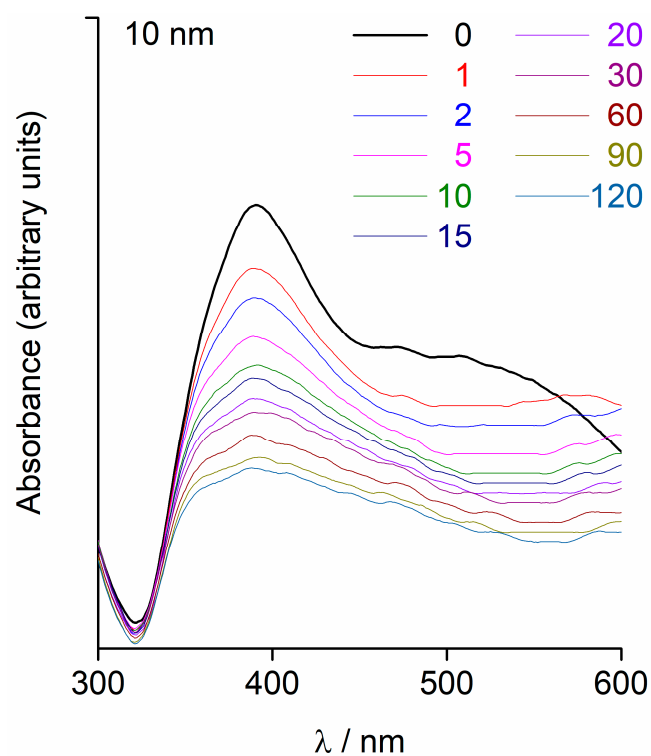

**Figure S1.** Temporal change in surface plasmon resonance for 10 nm AgNPs ( $1 \text{ mg L}^{-1}$ ) in FSW. Legend shows time in minutes after addition of AgNP to FSW.

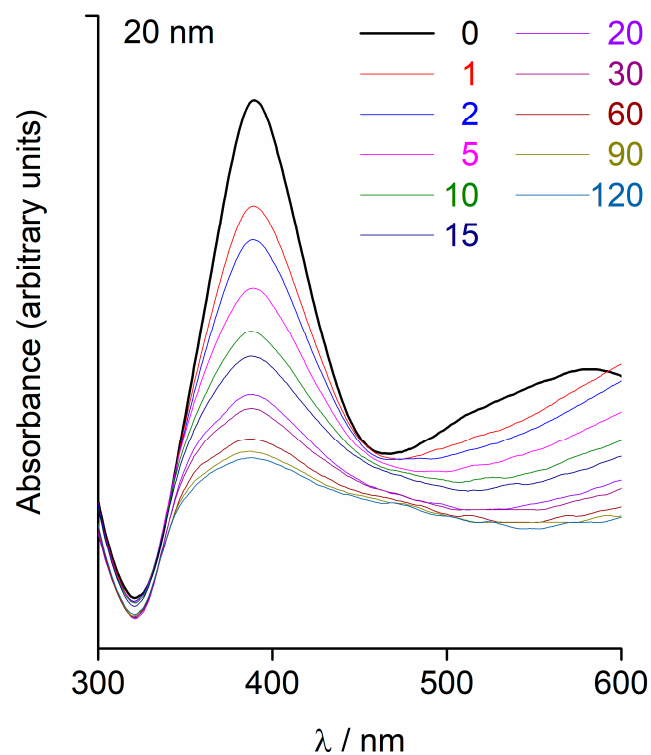

**Figure S2.** Temporal change in surface plasmon resonance for 20 nm AgNPs ( $1 \text{ mg L}^{-1}$ ) in FSW. Legend shows time in minutes after addition of AgNP to FSW.

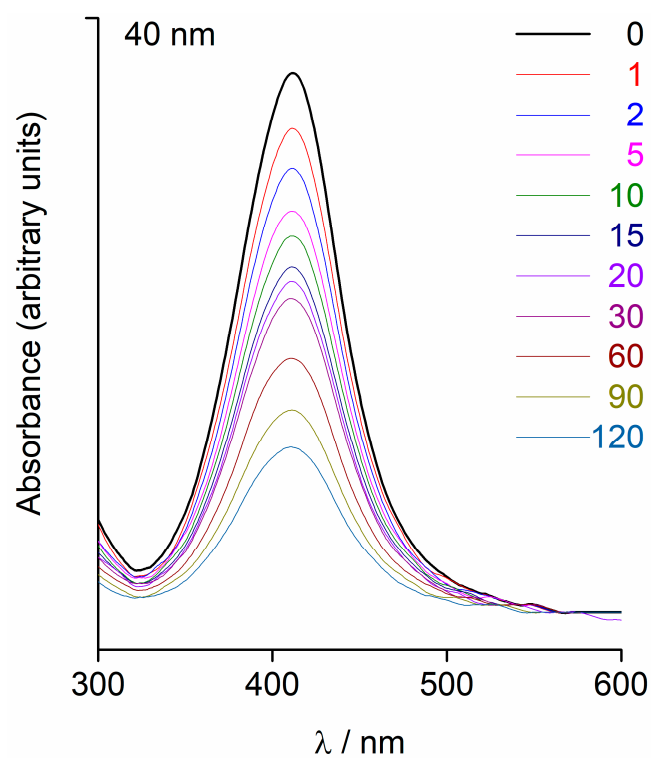

**Figure S3.** Temporal change in surface plasmon resonance for 40 nm AgNPs ( $1 \text{ mg L}^{-1}$ ) in FSW. Legend shows time in minutes after addition of AgNP to FSW.

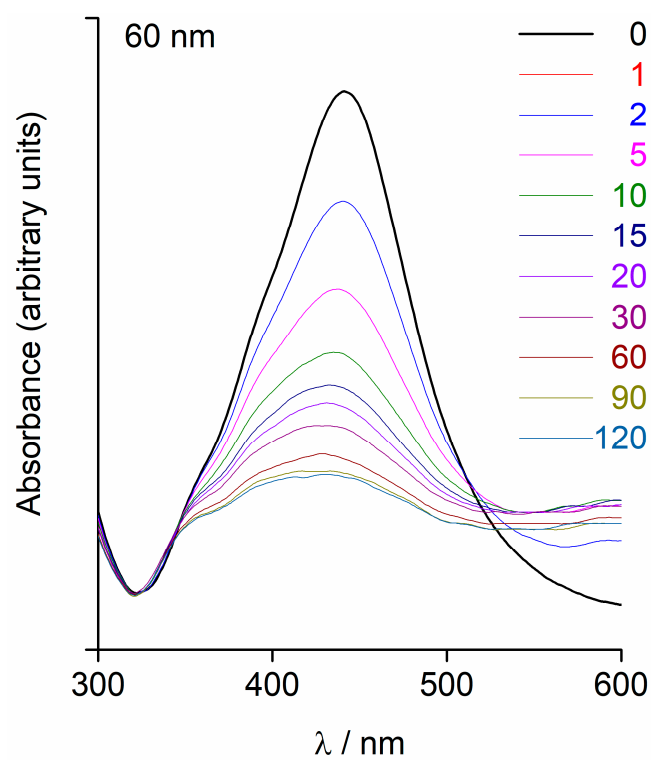

**Figure S4.** Temporal change in surface plasmon resonance for 60 nm AgNPs ( $1 \text{ mg L}^{-1}$ ) in FSW. Legend shows time in minutes after addition of AgNP to FSW.

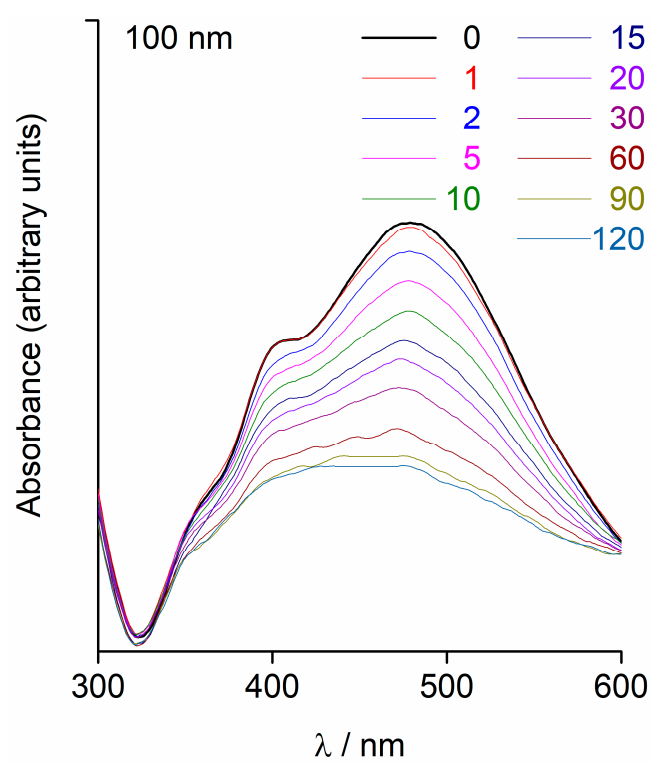

**Figure S5.** Temporal change in surface plasmon resonance for 100 nm AgNPs (1 mg L<sup>-1</sup>) in FSW. Legend shows time in minutes after addition of AgNP to FSW.

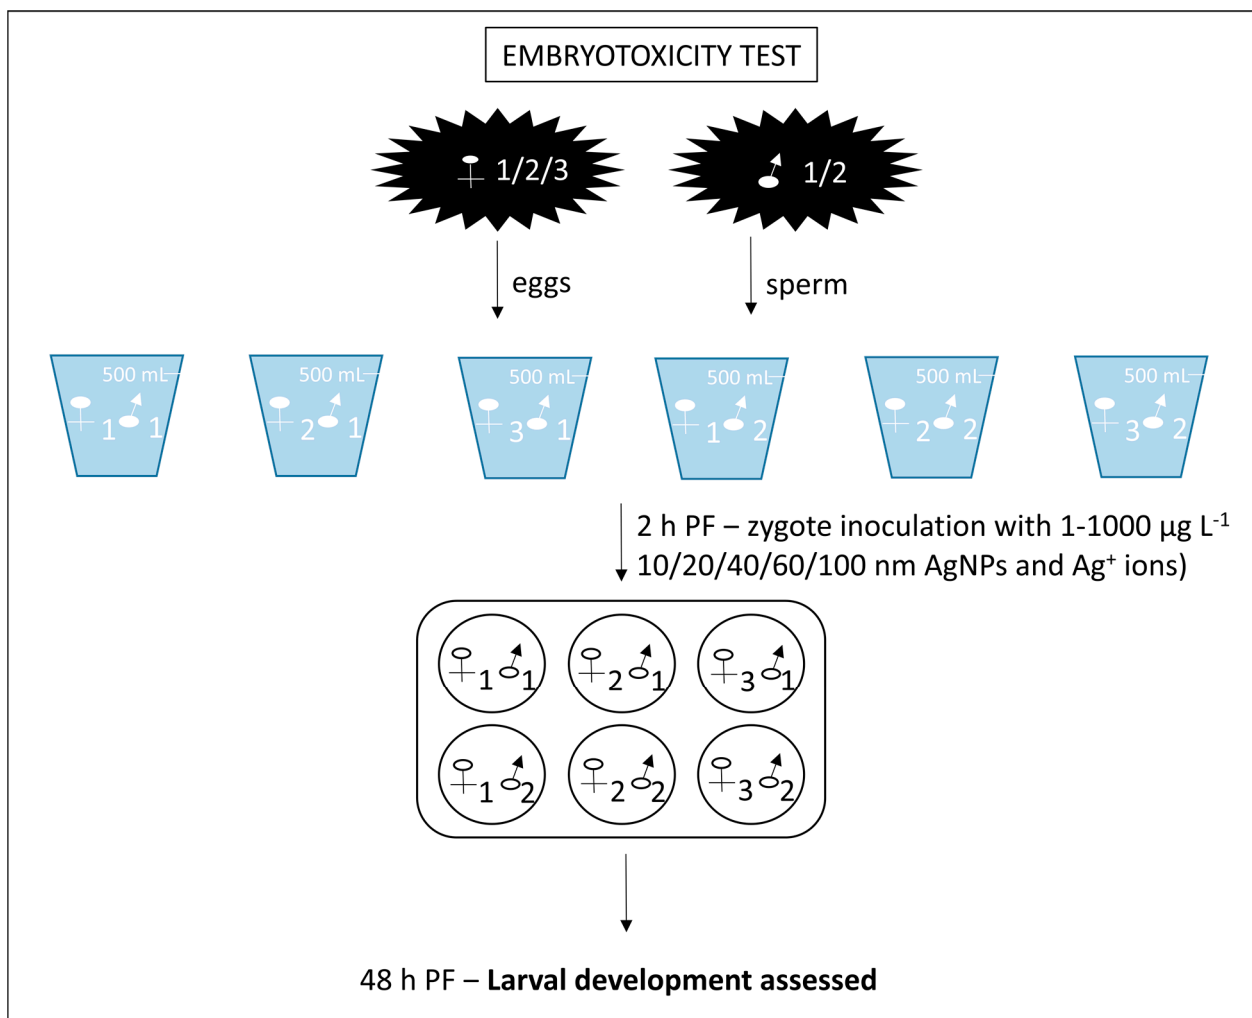

**Figure S6.** Schematic of the embryotoxicity assay workflow.

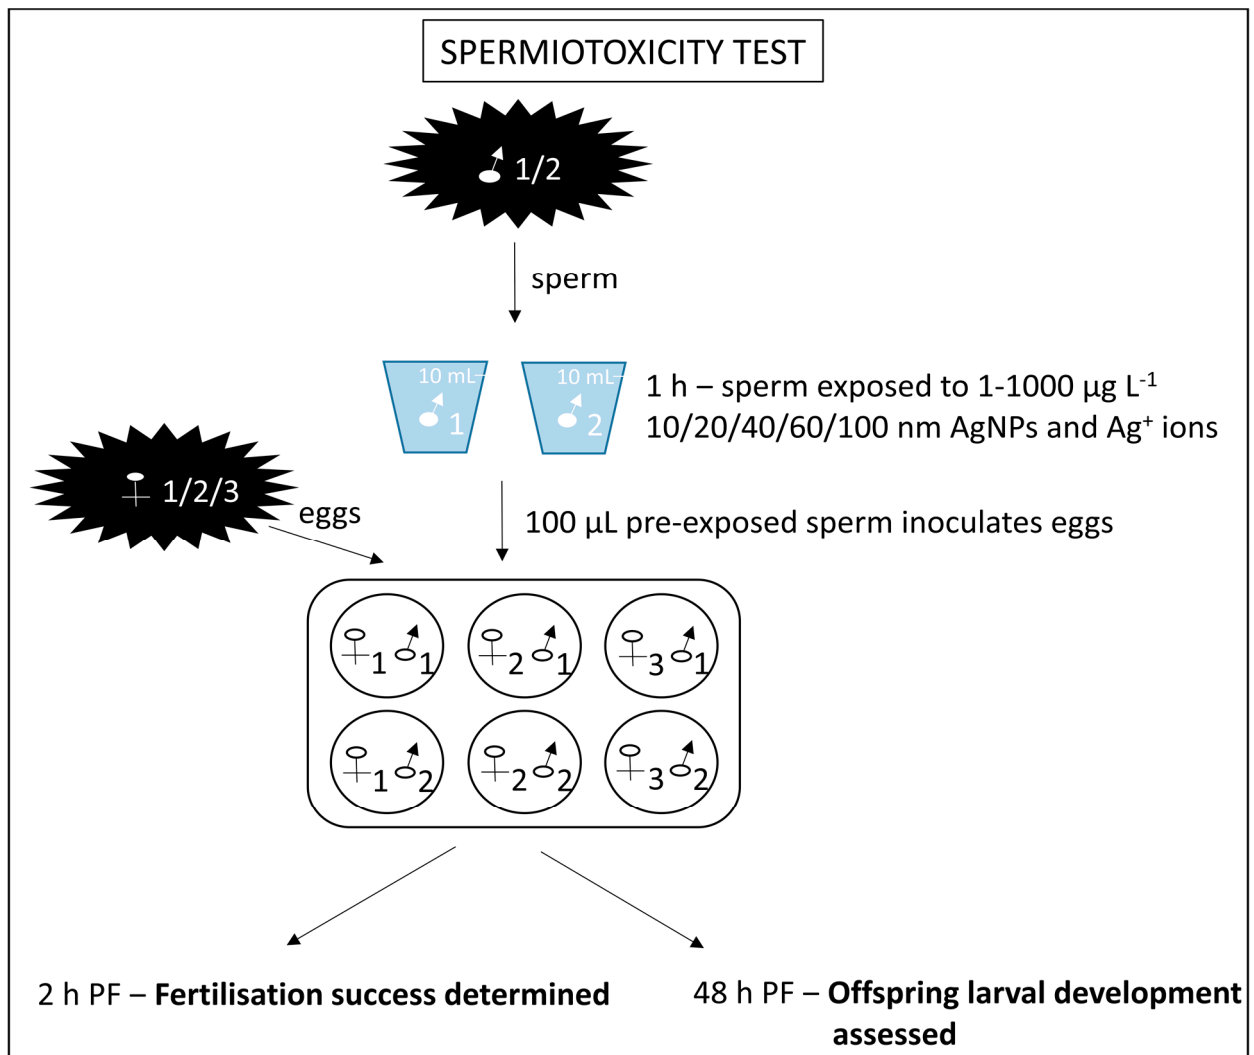

**Figure S7.** Schematic of the spermiotoxicity assay workflow.
